# Supplementary material for: Unbalanced redox status network as an early pathological event in congenital cataracts
Source: PubMed Central journal article supplement — Redox Biol. 2023 Sep 1;66:102869. doi: 10.1016/j.redox.2023.102869 (PMC10495660; doi:10.1016/j.redox.2023.102869), 2023-09-01

## Supplementary Figures

Fig. S1 Quantitative proteomics revealed upregulation in amino acid and glutathione metabolism pathways during WT lens development. **(A-B)** Developmentally downregulated DEPs in the lens at P1 compared to **(A)** E15 or **(B)** P1 compared to P30. **(C-D)** Developmentally upregulated DEPs in the lens at P1 compared to **(C)** E15 or **(D)** P1 compared to P30. The top ten (ranking by p-value) associated KEGG pathways are shown. Fold changes are indicated by color intensity according to key on right (blue is downregulated, red is upregulated developmentally). Pathways involved in glutathione and amino acid metabolism are highlighted in red.

Fig. S2 Mammalian phenotypes ontology characteristics associated with DEPs in K6W-Ub lenses. **(A-C)** Bar chart based on the  $-\log_{10}(\text{p-value})$  of top 10 enriched terms from the MGI Mammalian Phenotype library associated with downregulated proteins in K6W-Ub lenses at **(A)** E15, **(B)** P1, and **(C)** P30. **(D-F)** Bar chart based on the  $-\log_{10}(\text{p-value})$  of top 10 enriched terms from the MGI Mammalian Phenotype library associated with upregulated DEPs in K6W-Ub lenses at **(D)** E15, **(E)** P1, and **(F)** P30.

Fig. S3 Gene ontology biological processes associated with DEPs in K6W-Ub lenses. **(A-C)** Bar chart based on the  $-\log_{10}(\text{p-value})$  of top 10 enriched terms from the GO Biological Process library associated with downregulated proteins in K6W-Ub lenses at **(A)** E15, **(B)** P1, and **(C)** P30. **(D-F)** Bar chart based on the  $-\log_{10}(\text{p-value})$  of top 10 enriched terms from the GO Biological Process associated with upregulated DEPs in K6W-Ub lenses at **(D)** E15, **(E)** P1, and **(F)** P30.

Fig. S4 CMP data quantification for different metabolites in lenses from WT and K6W-Ub collected at different developmental stages. **(A-N)** Average intensity for **(A)** alanine, **(B)** cysteine, **(C)** aspartate, **(D)** lysine, **(E)** glutamate, **(F)** glutamine, **(G)** glycine, **(H)** arginine, **(I)** valine, and **(J)** serine in wild types and K6W-Ub lenses collected at E15 (*left*), P1 (*middle*) and P30 (*right*) are shown. All values are mean  $\pm$  SEM. and differences with WT were significant for (\*\*)  $p < 0.01$ ; n.s., not significant; n.a., not applicable due to sample size.

Fig. S5 HPLC data for different metabolites in lenses from WT and K6W-Ub collected at different developmental stages. **(A-N)** Lens content of **(A)** GSH, **(B)** GSSG, **(C)** serine, **(D)** glutamine, **(E)** histidine, **(F)** glycine, **(G)** threonine, **(H)** valine, **(I)** phenylalanine, **(J)** phenylalanine, **(K)** tyrosine, **(L)** lysine, **(M)** aspartic acid and **(N)** glutamic acid in wild types and K6W-Ub lenses collected at P1 (*left*) and P30 (*right*) are shown. All values are mean  $\pm$  SEM. and differences with WT were significant for (\*\*)  $p < 0.01$ .

**A**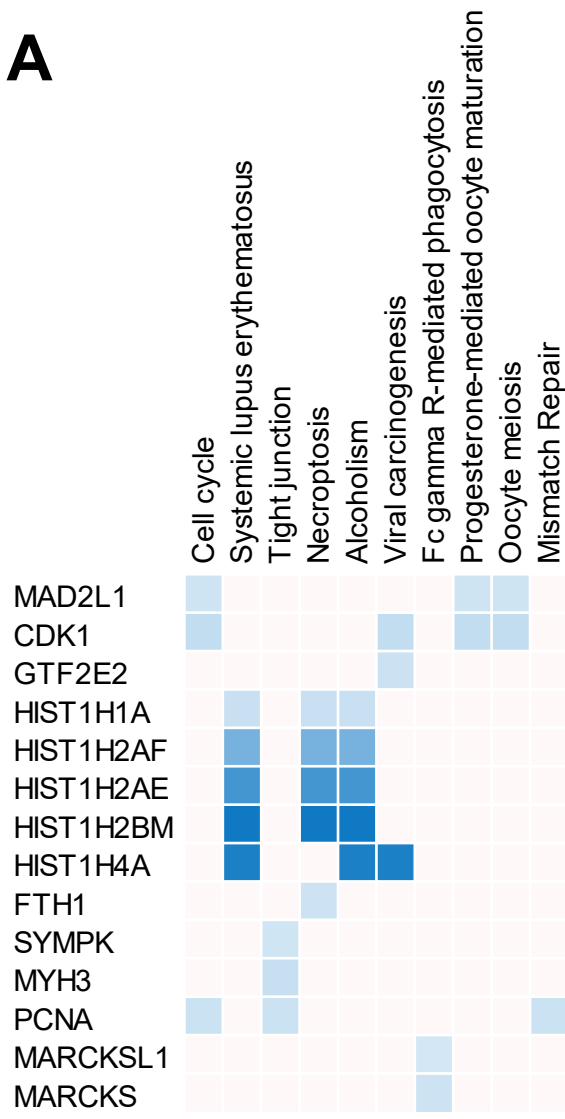**B**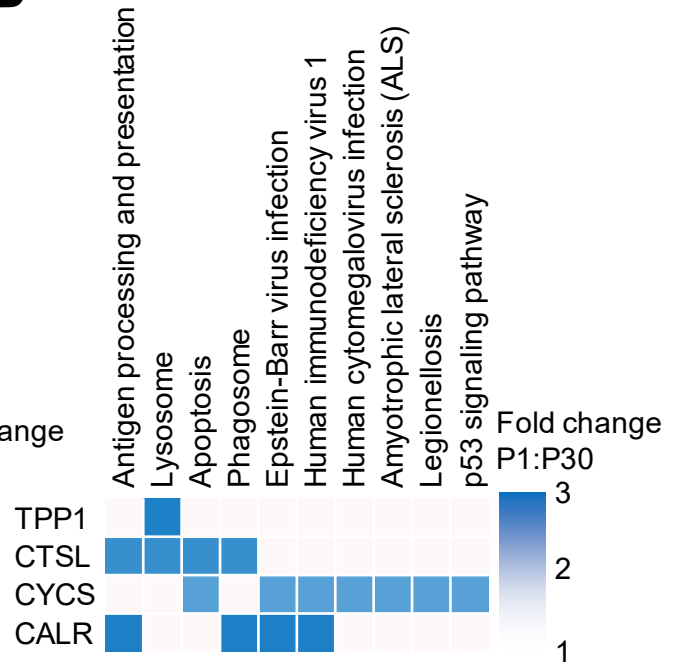**C**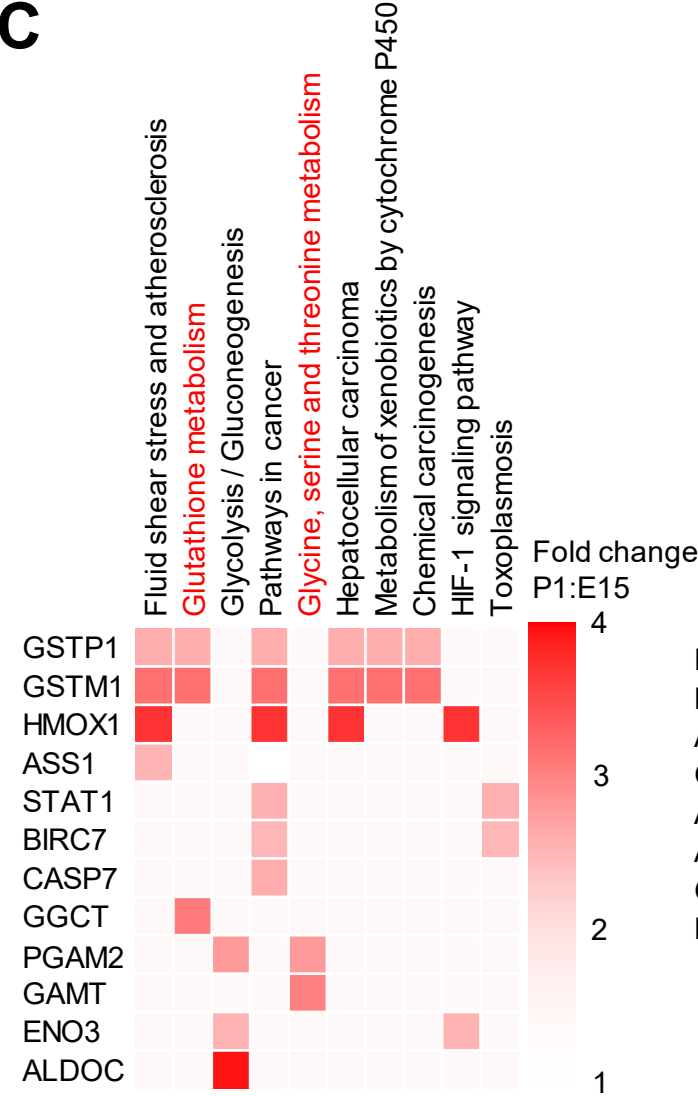**D**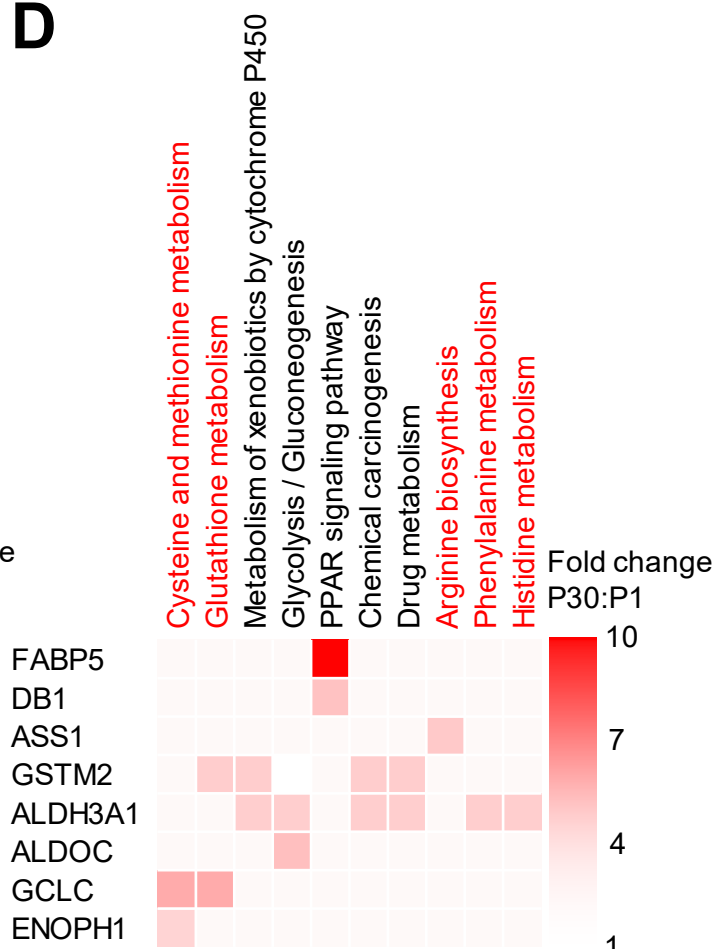

**A**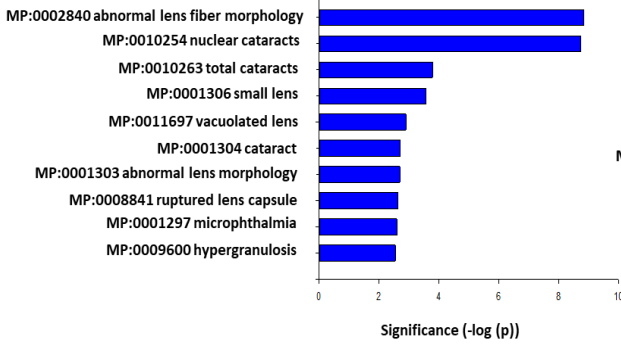**B**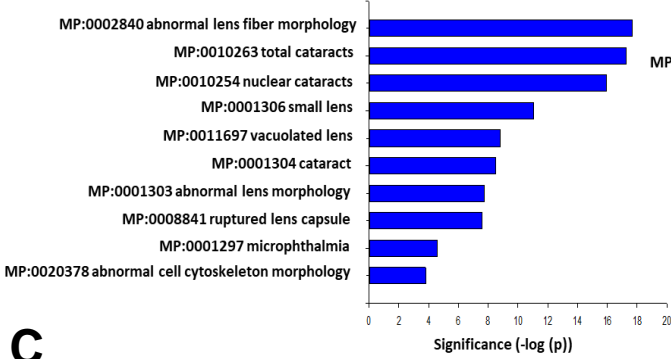**C**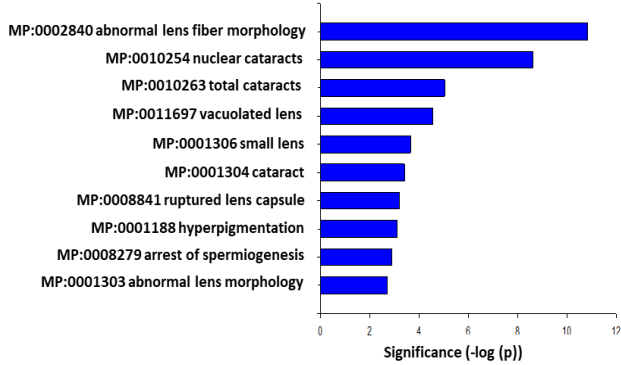**C**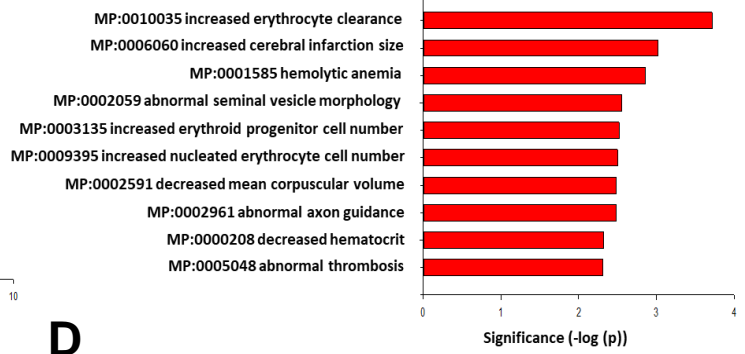**D**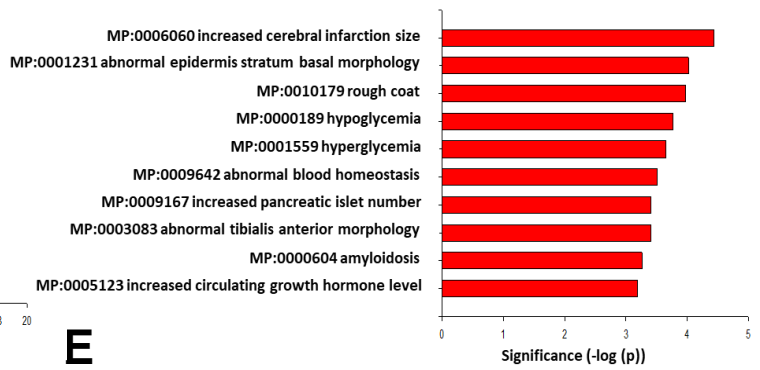**E**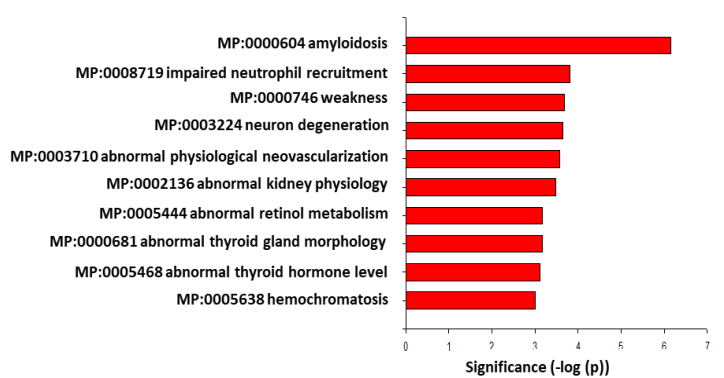

**A**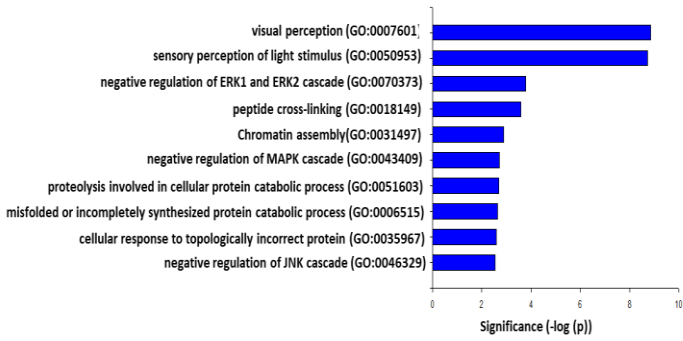**B**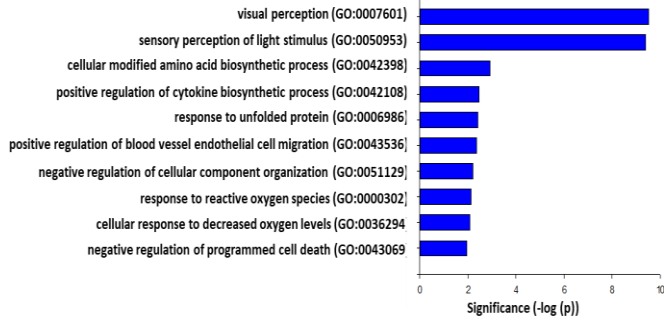**C**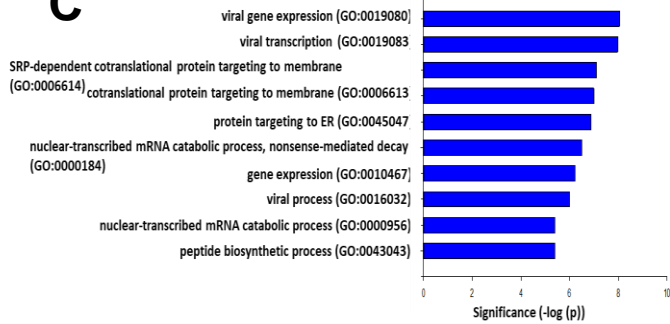**C**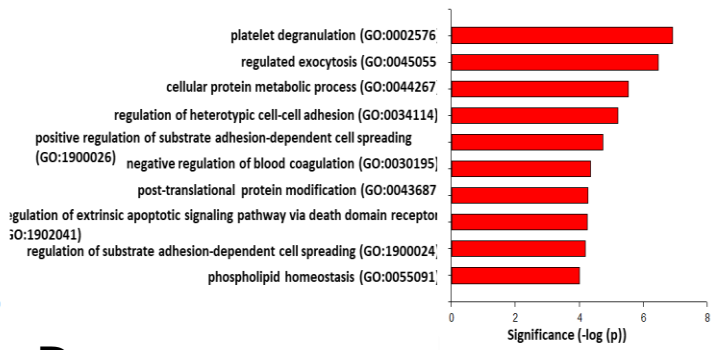**D**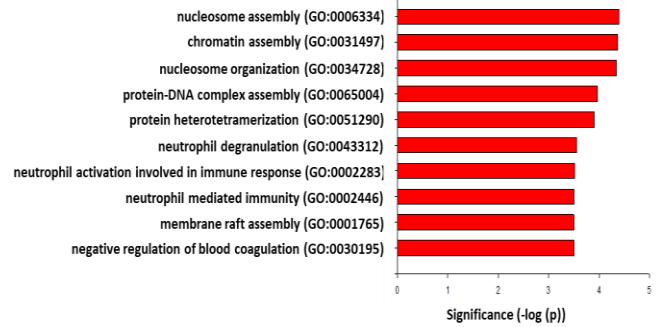**E**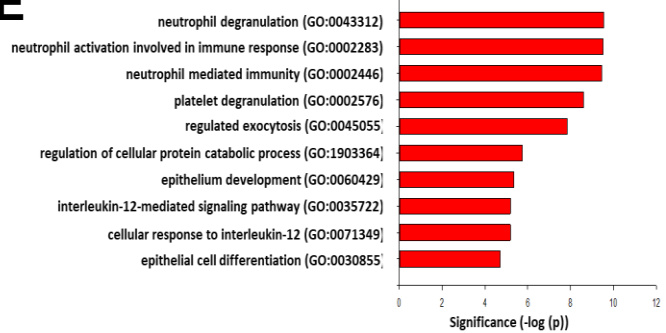

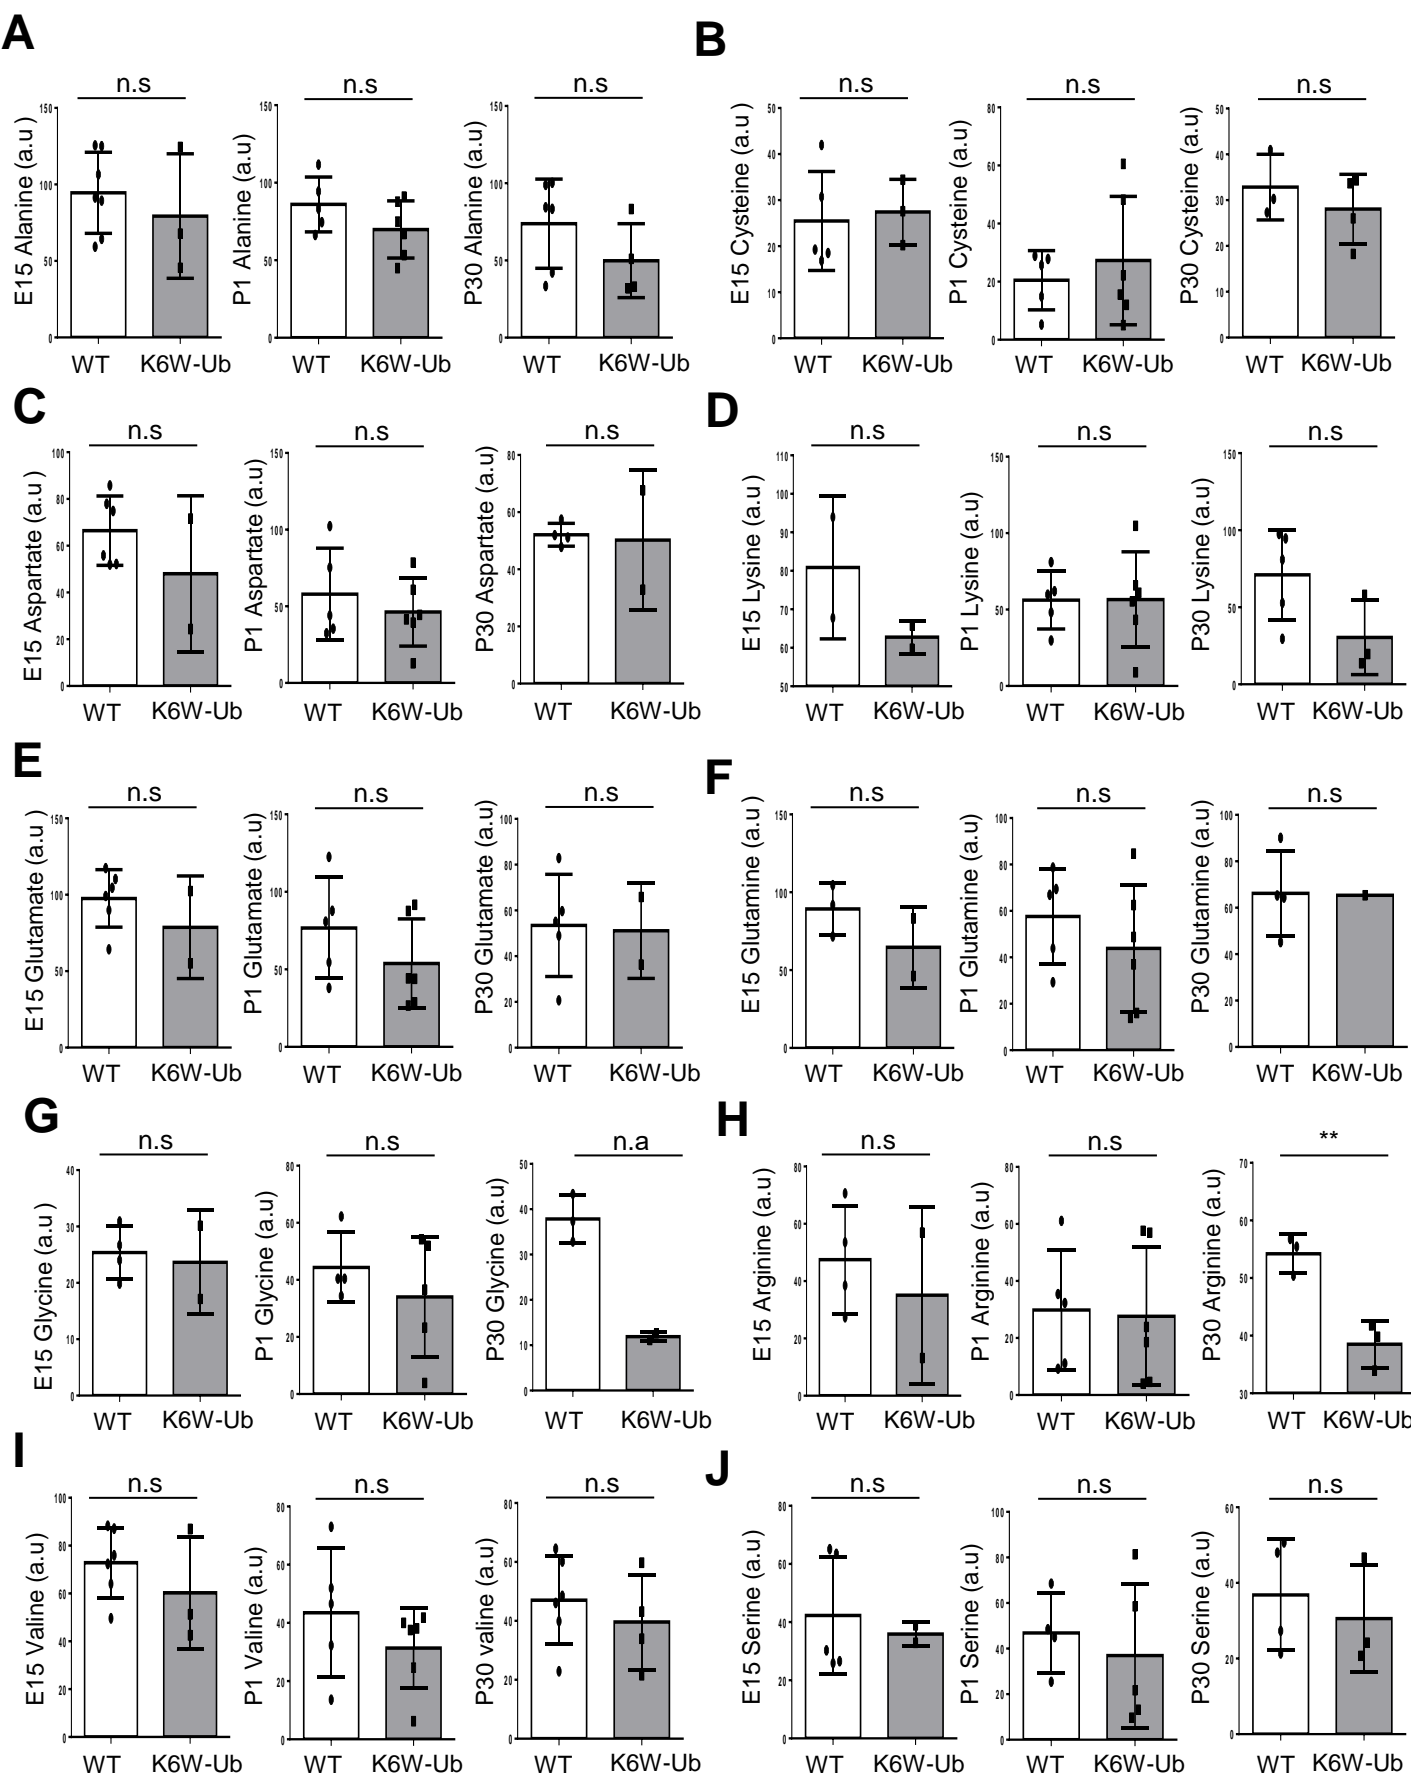

*Congenital cataracts and unbalanced redox status.- Suppl. Figure 4*

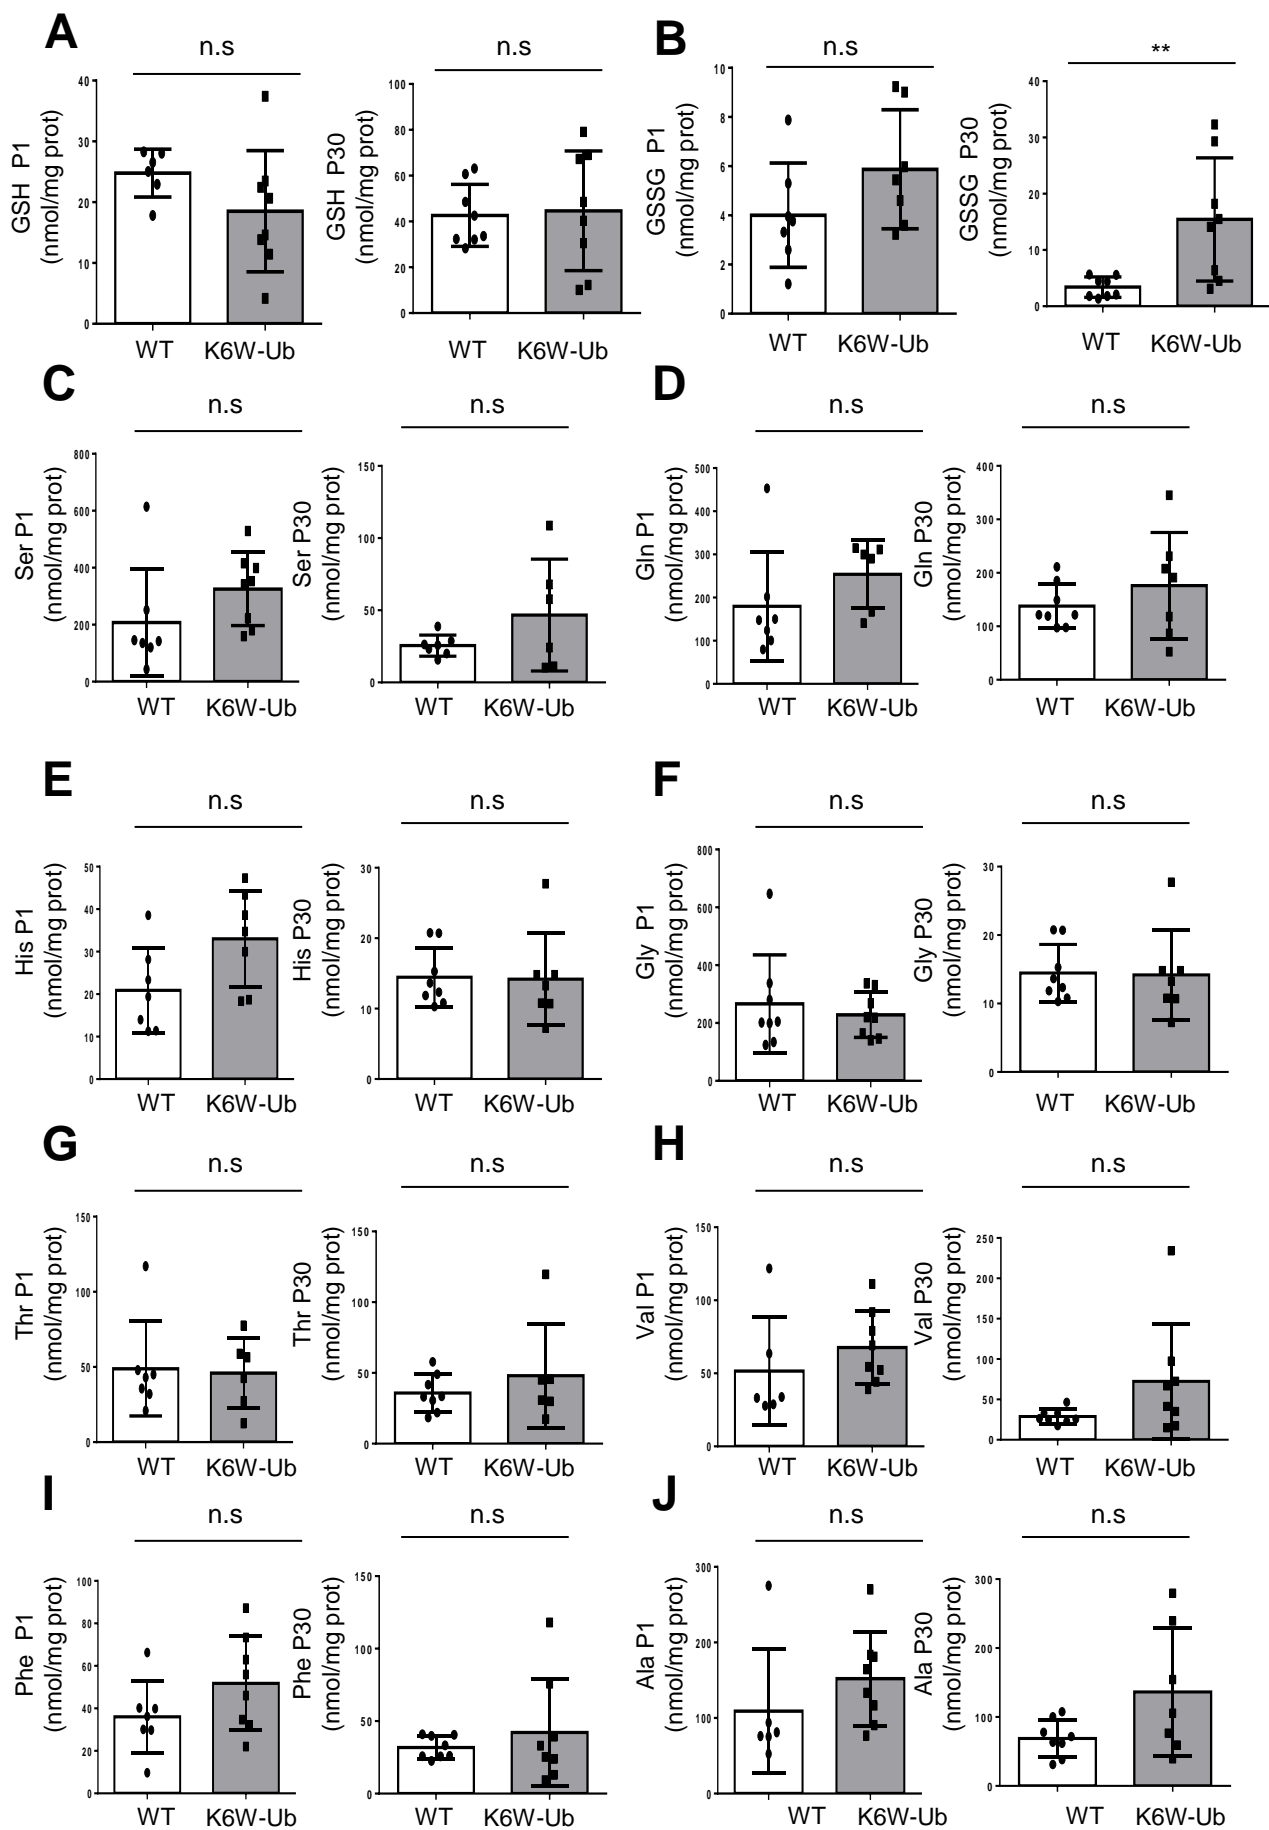

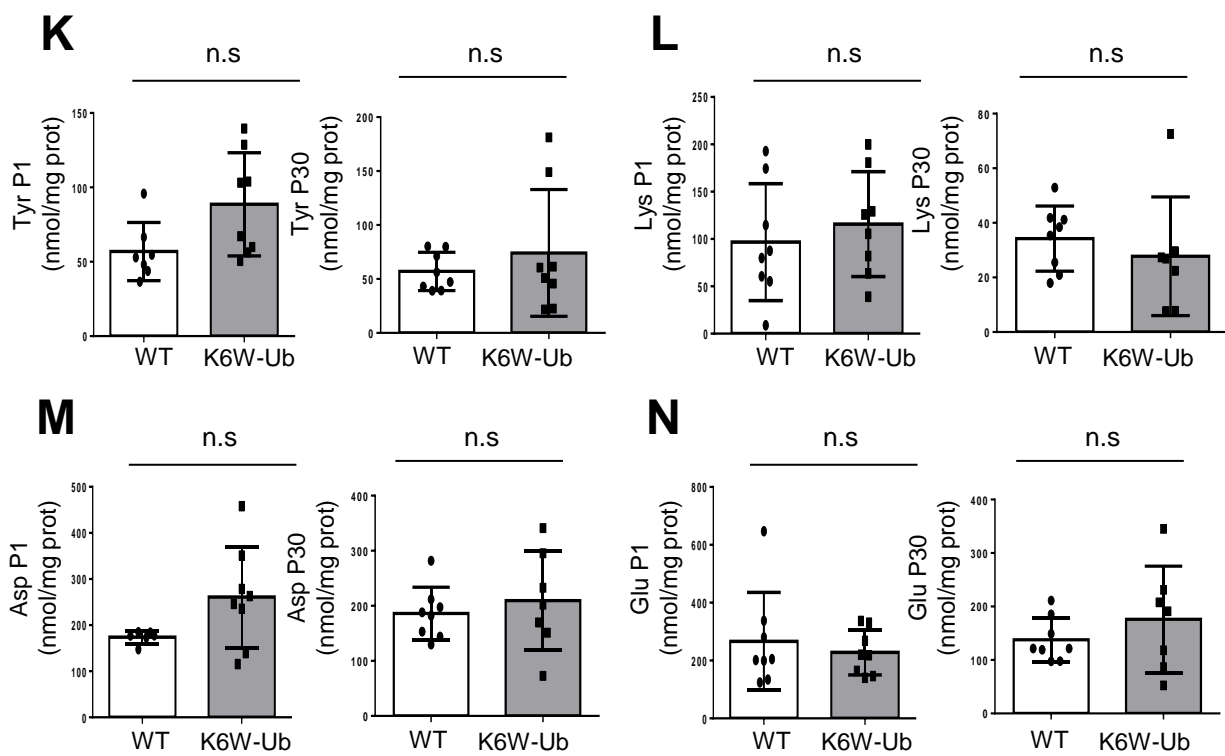

Supplement: mmc2.pdf [file mmc2.pdf]
